# Supplementary material
Source: PubMed Central journal article supplement (PMC3914618)
Supplement: 0cd408454e1684a1e4244d188f98bfcd_genetics.113.159541-6.pdf [file 0cd408454e1684a1e4244d188f98bfcd_genetics.113.159541-6.pdf]

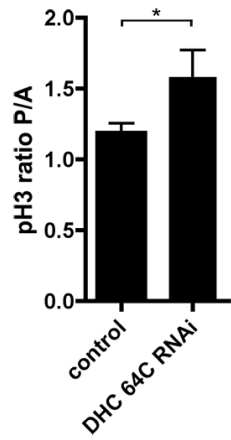

**Figure S6** Expression of dynein heavy chain RNAi results in increased mitotic index. The average PC/AC ratio of mitotic cells is increased in third instar imaginal wing discs expressing DHC 61B RNAi in the posterior compartment ( $p=0.0229$ ) Error bars represent SEM for  $n>4$
