# Supplementary material
Source: PubMed Central journal article supplement (PMC3914618)
Supplement: 5c941313dd364815b3e4deb7cad43778_genetics.113.159541-5.pdf [file 5c941313dd364815b3e4deb7cad43778_genetics.113.159541-5.pdf]

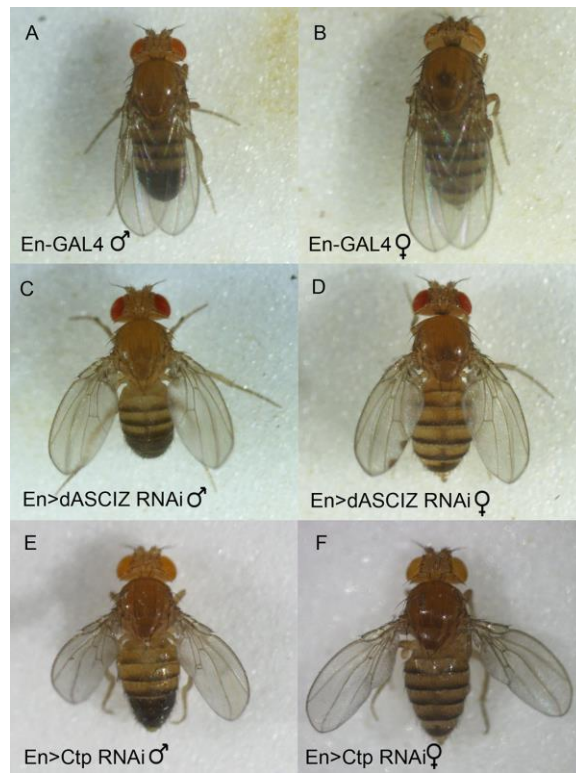

**Figure S2** Developmental phenotypes caused by dASCIZ and Ctp knockdown in the posterior wing compartment.

(A, B) Control En-GAL4 expression in (A) male and (B) female. (C, D) En>dASCIZ RNAi in (C) male and (D) female. (E, F) En>Ctp RNAi in (E) male and (F) female.
