# Supplementary material
Source: PubMed Central journal article supplement (PMC3914618)
Supplement: 8ce1e88154f4670db7df6f92fd337b85_genetics.113.159541-7.pdf [file 8ce1e88154f4670db7df6f92fd337b85_genetics.113.159541-7.pdf]

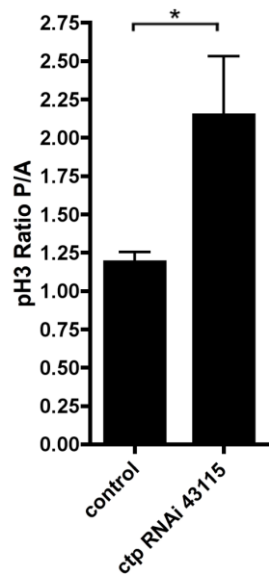

**Figure S5** Expression of alternate Ctp RNAi v43115 results in elevated mitotic index. The average PC/AC ratio of mitotic cells is increased in third instar imaginal wing discs expressing UAS-Ctp RNAi v43115 in the posterior compartment ( $p=0.0223$ ). Error bars represent SEM for  $n>10$ .
