# Supplementary material
Source: PubMed Central journal article supplement (PMC3914618)
Supplement: 14e6c310eeac0d801a7f85440c4421b2_genetics.113.159541-2.pdf [file 14e6c310eeac0d801a7f85440c4421b2_genetics.113.159541-2.pdf]

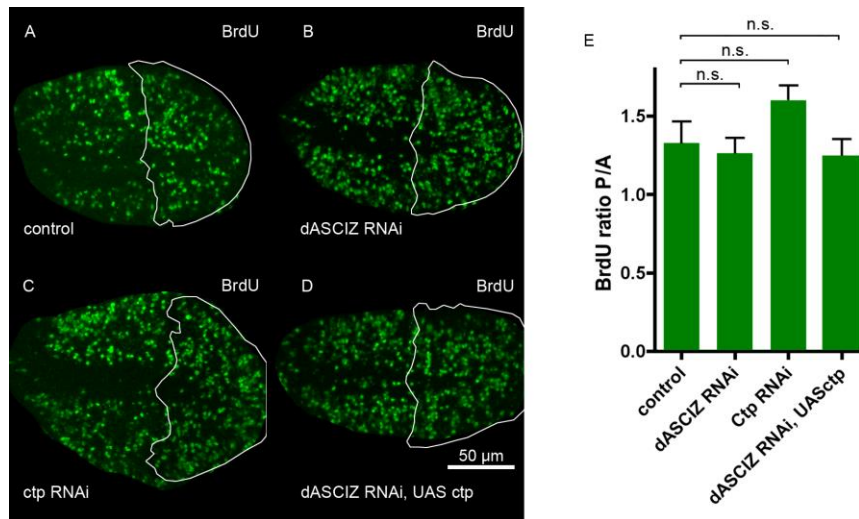

**Figure S4** Detection of cycling cells with BrdU labeling. (A-D) S phase in wing imaginal discs detected with 30 minute BrdU pulse, En-GAL4 expression in PC is outlined in white. (A) En>GAL4/+ control. (B) En>dASCIZ RNAi. (C) En>Ctp RNAi. (D) En>dASCIZ RNAi with UAS-Ctp overexpression. (E) PC/AC ratio of BrdU-positive cells. Ratio is unchanged for dASCIZ RNAi ( $p=0.6854$ ), Ctp RNAi ( $p=0.1187$ ) or dASCIZ RNAi, UAS Ctp ( $p=0.6180$ ).
