# Supplementary material
Source: PubMed Central journal article supplement (PMC3914618)
Supplement: 330c70183208c1d09dd5d94867cc34c7_genetics.113.159541-4.pdf [file 330c70183208c1d09dd5d94867cc34c7_genetics.113.159541-4.pdf]

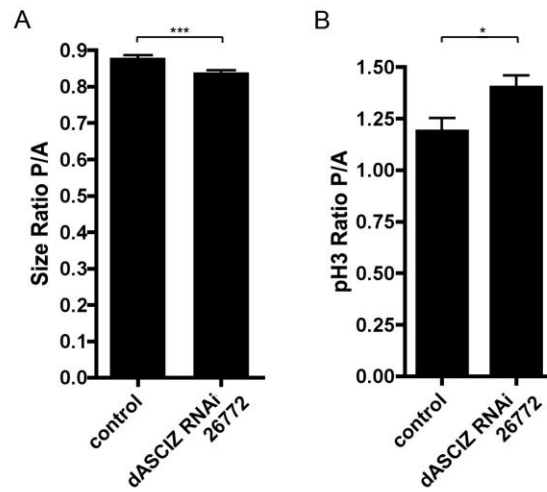

**Figure S3** Expression of alternate non-overlapping dASCIZ RNAi 26772 results in similar phenotypes to the main dASCIZ RNA line. (A) Ratio of the posterior wing compartment to the anterior compartment as defined in Fig. 2(F) is reduced in wings expressing UAS-dASCIZ RNAi 26772 in the PC, compared to control ( $p=0.0004$ ). Error bars represent SEM for  $n>9$ . (B) The average PC/AC ratio of mitotic cells is increased in third instar imaginal wing discs expressing UAS-dASCIZ RNAi 26772 in the posterior compartment ( $p=0.0246$ ). Error bars represent SEM for  $n>10$ .
