# Supplementary material
Source: PubMed Central journal article supplement (PMC3914618)
Supplement: 0699a44f372075e1d9598858f3d9fcb5_genetics.113.159541-9.pdf [file 0699a44f372075e1d9598858f3d9fcb5_genetics.113.159541-9.pdf]

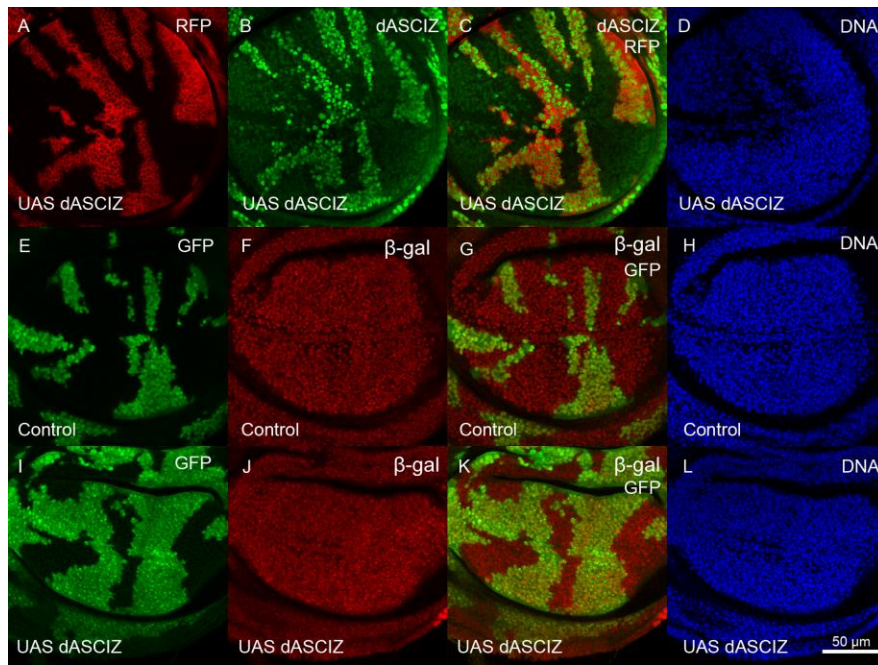

**Figure S8** dASCIZ overexpression does not alter Ctp promoter activity. (A-D) dASCIZ antibody staining in Actin-GAL4 UAS-dASCIZ “flip-out” clones positively marked with UAS-RFP, 3 days after clone induction. (E-H) Control GFP-marked clones induced in the Ctp-lacZ background, stained with β-gal antibody to detect Ctp promoter activity. (I-L) GFP-marked clones expressing UAS-dASCIZ, stained with β-gal antibody.
