# Supplementary material
Source: PubMed Central journal article supplement (PMC3914618)
Supplement: bec56e7ce07db0962d7832939570ba26_genetics.113.159541-3.pdf [file bec56e7ce07db0962d7832939570ba26_genetics.113.159541-3.pdf]

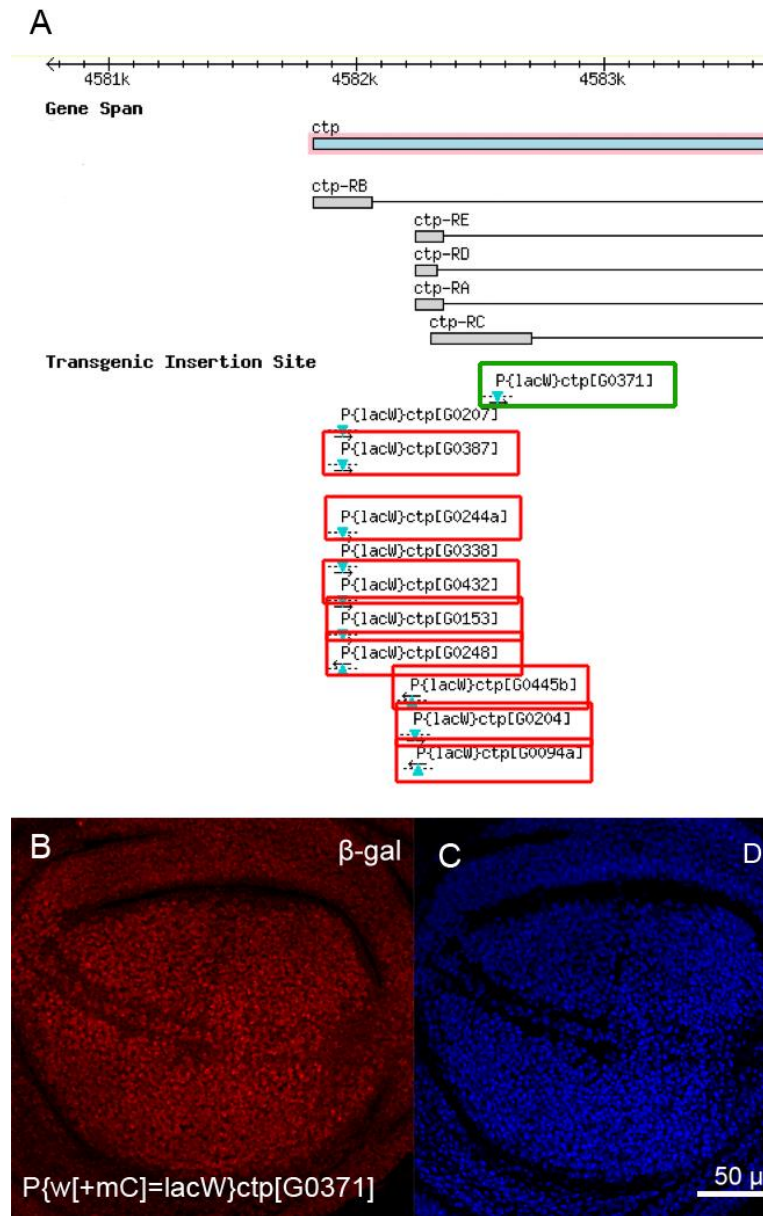

**Figure S7** P-element lacZ insertions mapped to the Ctp promoter region. (A) Region spanning promoter of Ctp gene (blue), with transcript variants RA-RE shown in grey and sites of P-element mediated lacZ insertions represented by blue triangles. Green highlights the lacZ insertion found to have the strongest and most even expression in larval wing imaginal discs. Red highlights lacZ insertions found to have little/no detectable response (data not shown). (Flybase, GBrowse view) (B, C) Ctp-lacZ expression detected with  $\beta$ -gal antibody staining, showing ubiquitous Ctp promoter activity throughout the wing disc.
