# Supplementary material
Source: PubMed Central journal article supplement (PMC3914618)
Supplement: ef7bc9397ddd281e1f5c2a7bc54f573c_genetics.113.159541-8.pdf [file ef7bc9397ddd281e1f5c2a7bc54f573c_genetics.113.159541-8.pdf]

**A**

```

human MAASEAAAAAGSAAALAAGARAVPAATTGAAAAASGPWVPPGPRLRGSRPRPAGATQQPAV
fly -----MHSEK
      :.

human PAPPAGELIQPSVSELSRAVRTNILCTVRGCGKILPNSPALNMHLVKSHRLQDGI VNP TI
fly HTPDIRELMPVREHRCERCP-----SLVFGNLSHYQLHLRRR--QEVIPPSVI
      :*  ** : . . * . . : : * . : : * : * * : * . * . *

human RKDLKTGPKFYCCPIEGCPRGPERPFSQFSLVKQHFMMKHAEEKKHKCSKCSNSYGTWDL
fly GPIVAFHCPVEKCIYHVATKG-ARSFTSLRLLRQHYQKSHLDENYKCLACGGKFLQHHL
      : . * . . . : * * . : : * : * * : * : * * * . . : : . *

human KRHAEDCGKTFRCCTGCPYASRTALQSHIYRTGHEIPAHRDPPSKRRKMENCAQNOKLS
fly EKH--QCSKHKCPVCELTYNKAGLRTHMRRKNHLVHHESDKVIP-----S
      : : * : * . * . * * : : . * : : * : * : * . * . *

human NKTIESLNNQPIPRPDTQELESEIKLEPSFEDSCGSNTDKQTLTTPPRYPQKLLLPKP
fly LATWKR LNPQPIP-----
      * : * * * * *

```

**B**

| human      | <i>Drosophila</i> |
|------------|-------------------|
| 1-SVHTQTTF | 1-DMETQTE         |
| 2-SRETQTS  | 2-DIETQTP         |
| 3-DNQTQTI  | 3-HMYTQTC         |
| 4-NIQTQTE  | 4-HIQTQTH         |
| 5-DIETQTD  | 5-TQHTQTC         |
| 6-MFDTQTQ  | 6-STCTQTR         |
| 7-DTQTQTD  |                   |
| 8-DIETQTE  |                   |
| 9-STETQTM  |                   |
| 10-SNETQTA |                   |
| 11-SVETQTS |                   |

**Figure S1** Comparison of human ASCIZ and dASCIZ. (A) Alignment of the N-terminal regions of human ASCIZ and dASCIZ. \*, identical residues; :, highly conserved residues; ., conserved residues. (B) Compilation of TQT motifs in human ASCIZ (left) and dASCIZ (right) arranged from top to bottom in their N- to C-terminal order (compare Fig. 1A).
